# Supplementary material for: Metabolomics studies of cell–cell interactions using single cell mass spectrometry combined with fluorescence microscopy
Source: Royal Society of Chemistry journal article supplement (doi:10.1039/d2sc02298b), 2022-01-01
Supplement: d2sc02298b1.pdf [file d2sc02298b1.pdf]

## Supporting Information

### Metabolomics Studies of Cell-Cell Interactions using Single Cell Mass Spectrometry Combined with Fluorescence Microscopy

Xingxiu Chen,<sup>[a]</sup> Zongkai Peng,<sup>[a]</sup> and Zhibo Yang<sup>\*[a]</sup>

[a] Department of Chemistry and Biochemistry, University of Oklahoma, Norman, Oklahoma 73019, USA

#### Table of Contents

|                                                                                 |           |
|---------------------------------------------------------------------------------|-----------|
| <b>Supplementary Figures .....</b>                                              | <b>2</b>  |
| <b>Fig. S1. Cell viability measurements .....</b>                               | <b>2</b>  |
| <b>Fig. S2. ImageJ quantification of fluorescence intensity.....</b>            | <b>3</b>  |
| <b>Fig. S3. PCA and PLS-DA plots.....</b>                                       | <b>4</b>  |
| <b>Fig. S4. Background-subtracted SCMS spectra (positive ion mode).....</b>     | <b>5</b>  |
| <b>Fig. S5. Background-subtracted SCMS spectra (negative ion mode).....</b>     | <b>6</b>  |
| <b>Fig. S6. T-test results of mono-culture and co-culture experiments .....</b> | <b>7</b>  |
| <b>Fig. S7. PCA and t-test results of IRI treatment experiment. ....</b>        | <b>8</b>  |
| <b>Fig. S8. MS<sup>2</sup> at the single-cell level.....</b>                    | <b>9</b>  |
| <b>Fig. S9. MS<sup>2</sup> of cell lysate using direction injection.....</b>    | <b>13</b> |
| <b>Fig. S10. MS<sup>2</sup> of cell lysate using HPLC-MS .....</b>              | <b>15</b> |
| <b>Fig. S11. MS<sup>2</sup> of cell lysate in the negative ion mode .....</b>   | <b>18</b> |

## Supplementary Figures

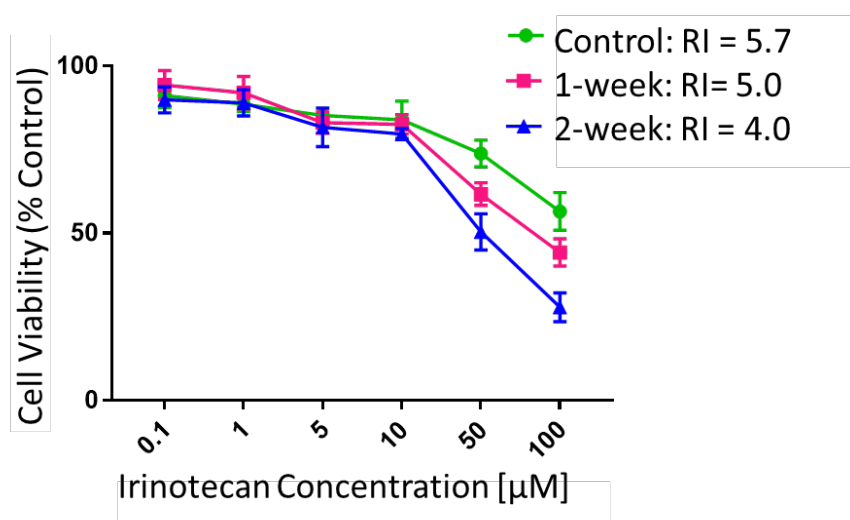

Fig. S1. Cell viability measurements (means  $\pm$  SD) of IRI-HCT116 cells (Control) and IRI-HCT116 cells cultured in drug-free medium for 1 (1-week) or 2 weeks (2-week). RI (resistant index) was calculated as the ratio of  $IC_{50}$  of IRI-HCT116 cells under different conditions to that of the parental HCT116 cells. Data are obtained from  $n = 5$  measurements.

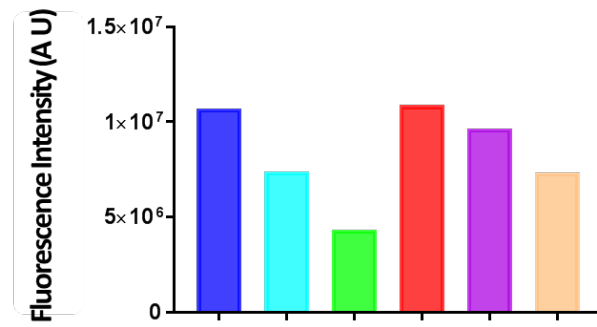

|                         |   |   |    |   |   |    |
|-------------------------|---|---|----|---|---|----|
| HCT116-GFP:             | + | + | +  | + | + | +  |
| HCT116:                 | + | + | +  | - | - | -  |
| IRI-resistant HCT116:   | - | - | -  | + | + | +  |
| IRI concentration (μM): | 0 | 5 | 10 | 0 | 5 | 10 |

Fig. S2. Quantification of fluorescence intensity of HCT116-GFP cells in the co-culture systems under different IRI treatment concentrations. HCT116-GFP cells co-cultured with the regular HCT116 cells exhibited lower fluorescence intensity (i.e., lower proliferation) compared with those co-cultured with IRI-HCT116 cells. Fluorescence images were captured using a 4X objective lens to include all cells in a well. Fluorescence intensities of fluorescence images (n = 3 replicates) were quantified using ImageJ.

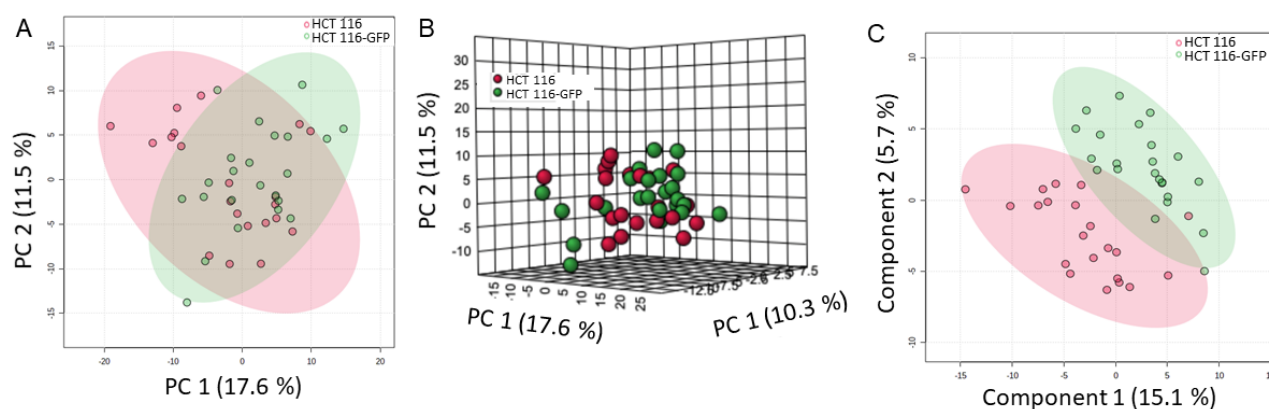

Fig. S3. Comparison of SCMS metabolomics profiles of mono-cultured HCT116 and HCT116-GFP cells using (A) 2D PCA, (B) 3D PCA, and (C) 2D PLS-DA ( $n = 20$  in each group). Both PCA and PLS-DA ( $p = 0.698$ ) results show that there is no significant difference of metabolic profiles between these two types of cells.

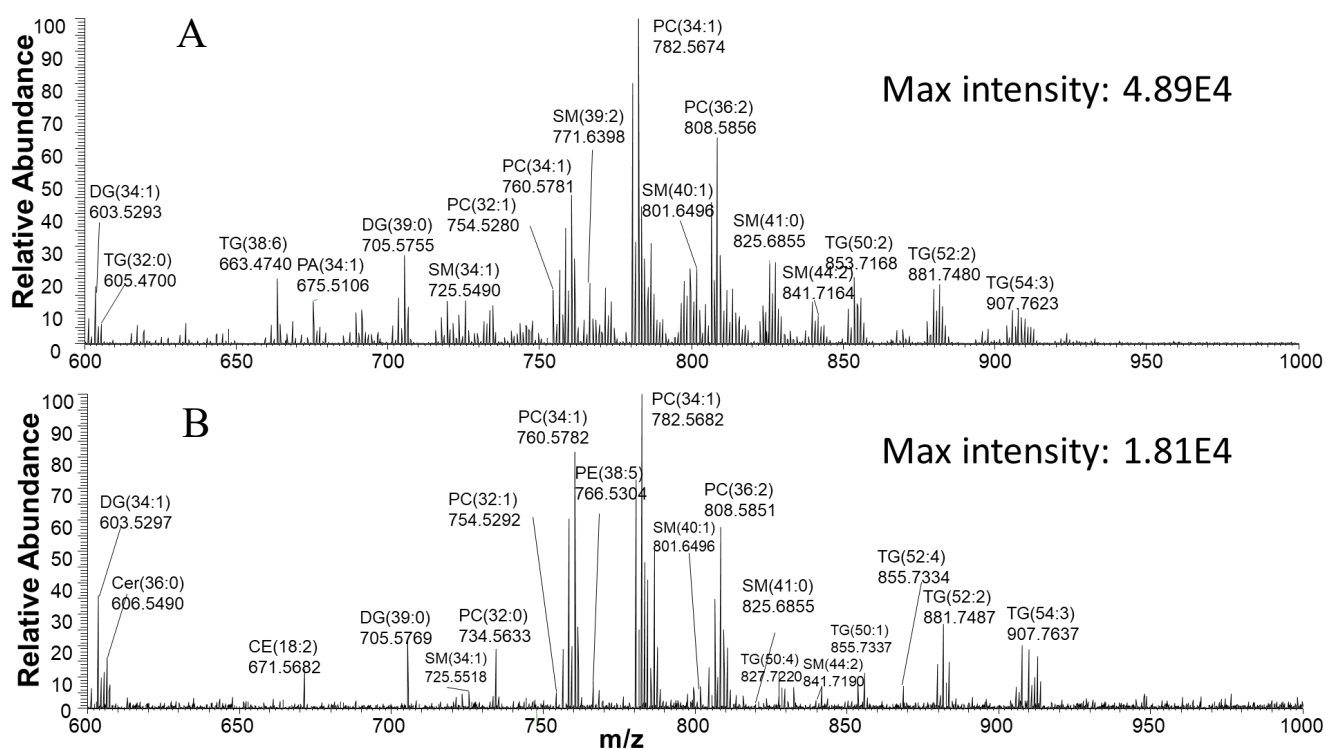

Fig. S4. Typical background-subtracted SCMS spectra of (A) a co-cultured HCT116-GFP cell and (B) a mono-cultured HCT116-GFP cell in the positive ion mode. Species are tentatively labeled by searching the measured  $m/z$  values through online databases. The range of  $m/z$  = 600–1,000 was illustrated to compare different SMs expression levels.

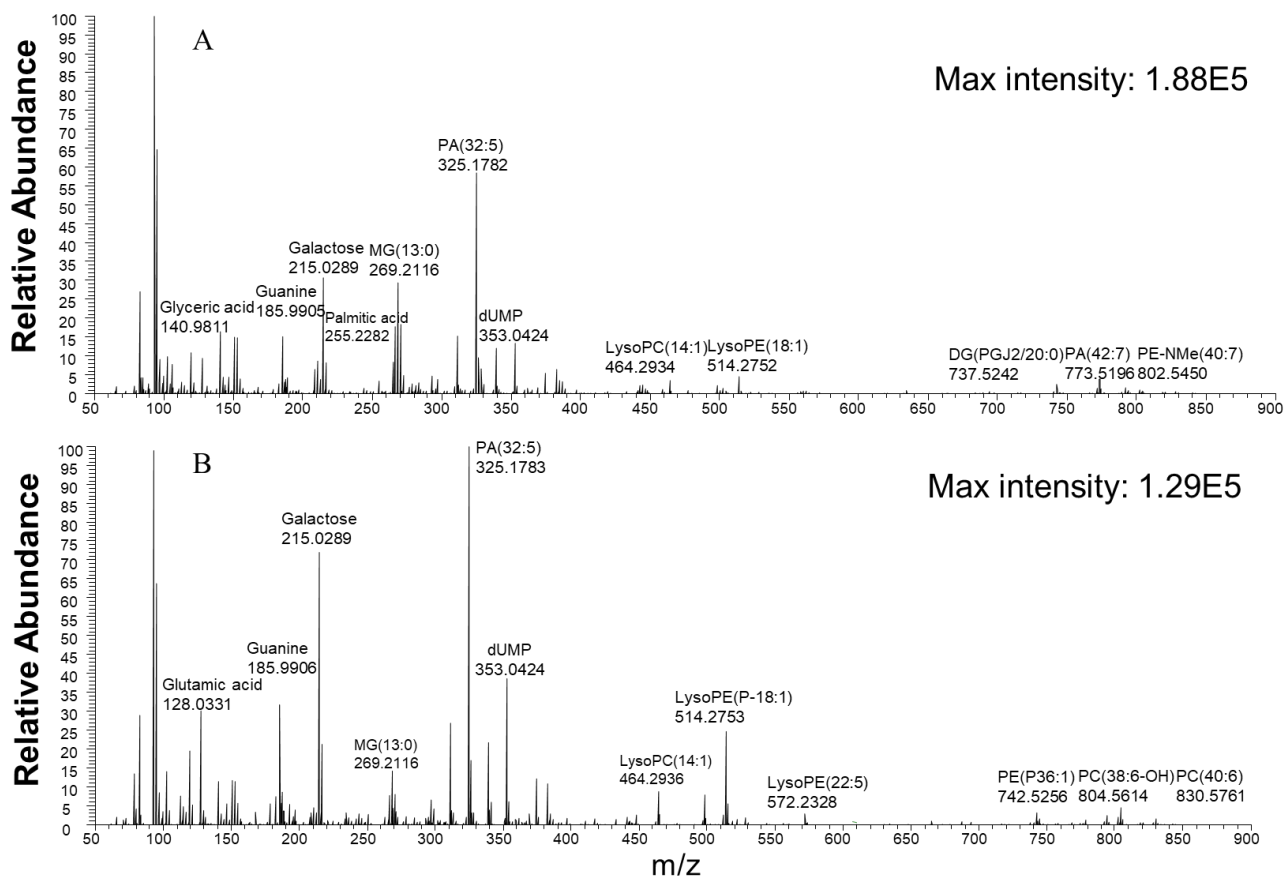

Fig. S5. Typical background-subtracted SCMS spectra of (A) a co-cultured HCT116-GFP cell and (B) a mono-cultured HCT116-GFP cell in the negative ion mode. Species are tentatively labeled by searching the measured  $m/z$  values through online databases.

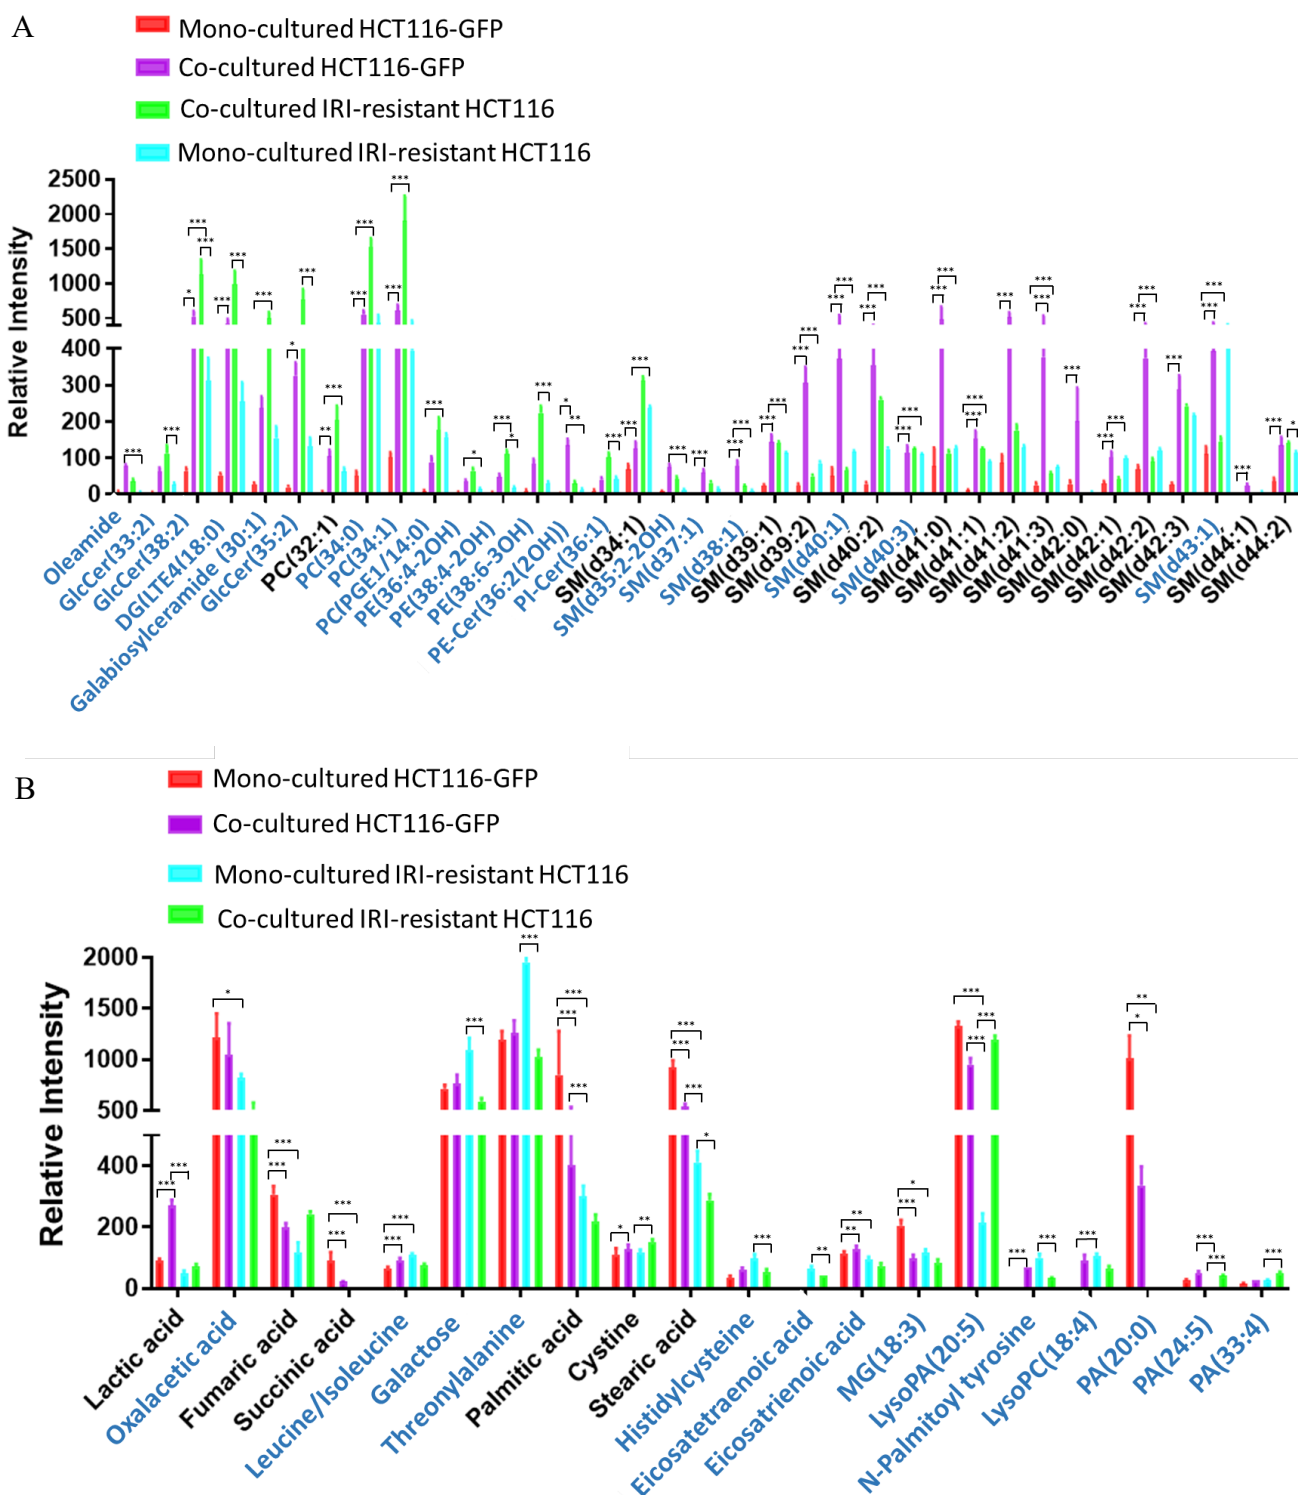

Fig. S6. Comparison of the relative abundances of metabolites in cells from different groups. Results were obtained from (A) the positive and (B) negative ion modes. T-test was used for the comparison of mono-cultured HCT116-GFP and mono-cultured IRI-resistant HCT116, mono-cultured IRI-resistant HCT116 and co-cultured HCT116-GFP, and co-cultured IRI-resistant HCT116 and mono-cultured IRI-resistant HCT116 cells. Species in black font were identified from MS<sup>2</sup> analyses. (From t-test: \*  $p < 0.05$ , \*\*  $p < 0.01$ , \*\*\*  $p < 0.005$ .)

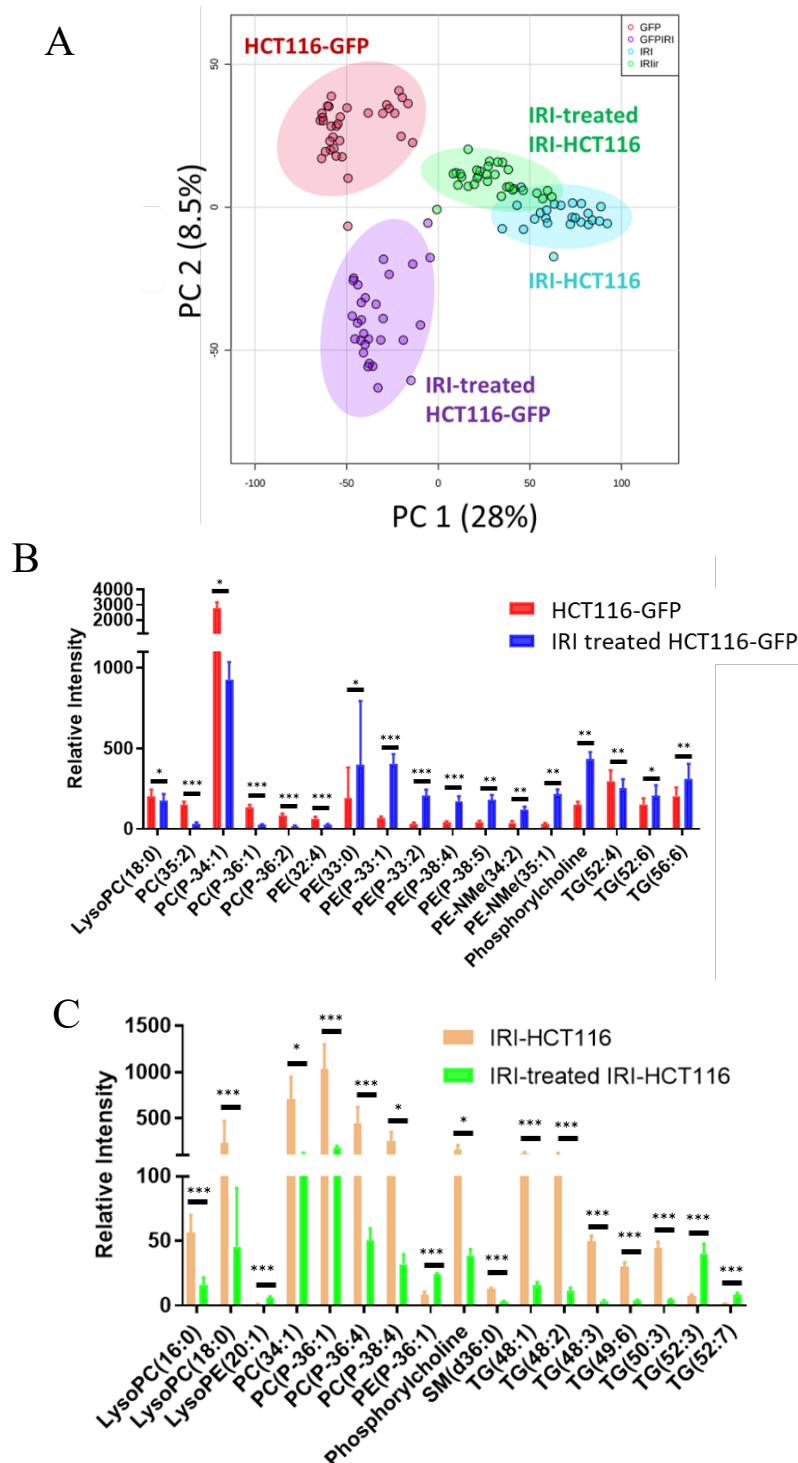

Fig. S7. Influence of IRI treatment on the metabolomic profiles of single HCT116-GFP (drug-sensitive) and IRI-HCT116 (drug-resistant) cells from mono-culture. (A) PCA results of cells with and without drug treatment. T-test results showing species with significantly altered abundances in (B) HCT116-GFP and (C) IRI-HCT 116. IRI at  $IC_{50}$  (2.9  $\mu$ M and 16  $\mu$ M for HCT116-GFP and IRI-resistant cells, respectively) was used for treatment. Experiments were conducted in the positive ion mode ( $n = 30$  in each group). Species were tentatively labeled. (From t-test: \*  $p < 0.05$ , \*\*  $p < 0.01$ , \*\*\*  $p < 0.005$ .)

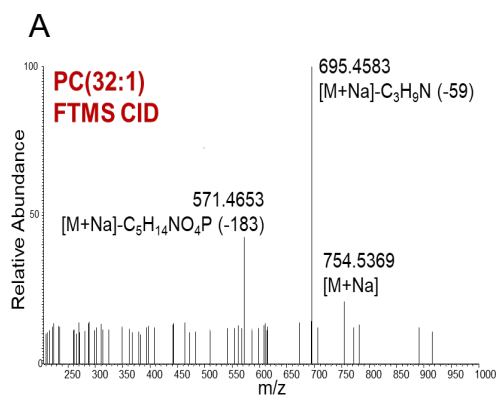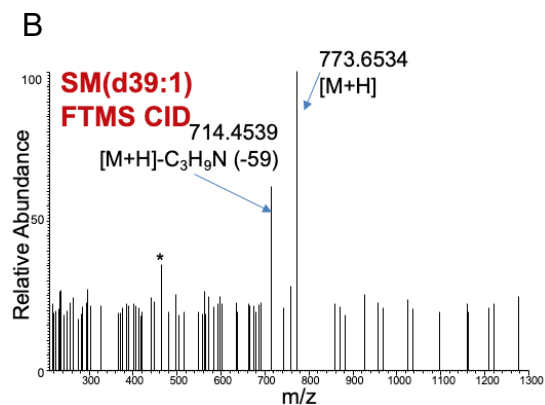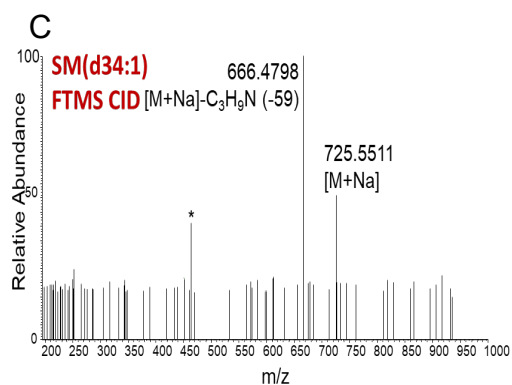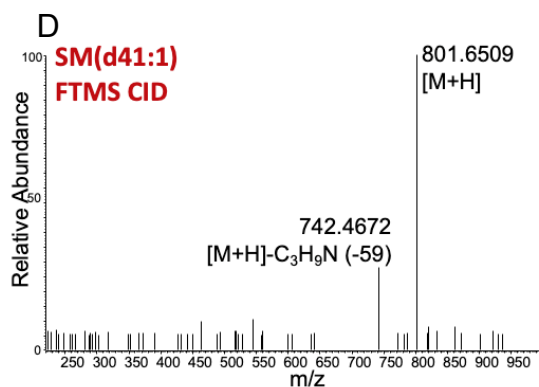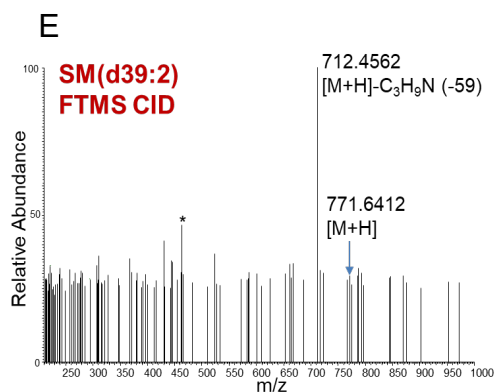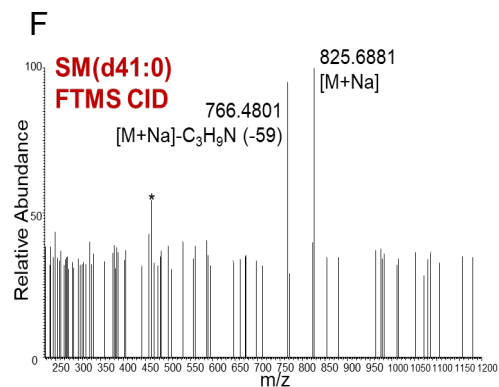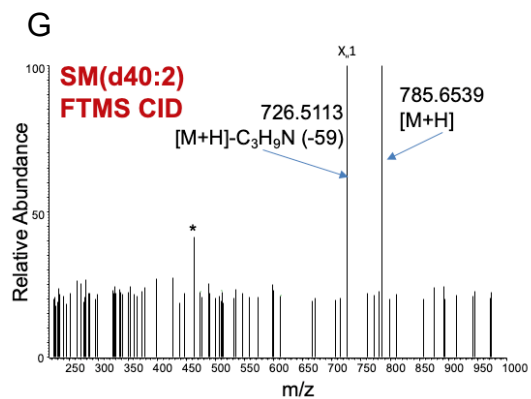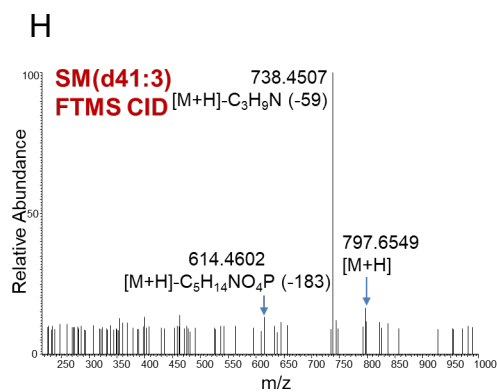

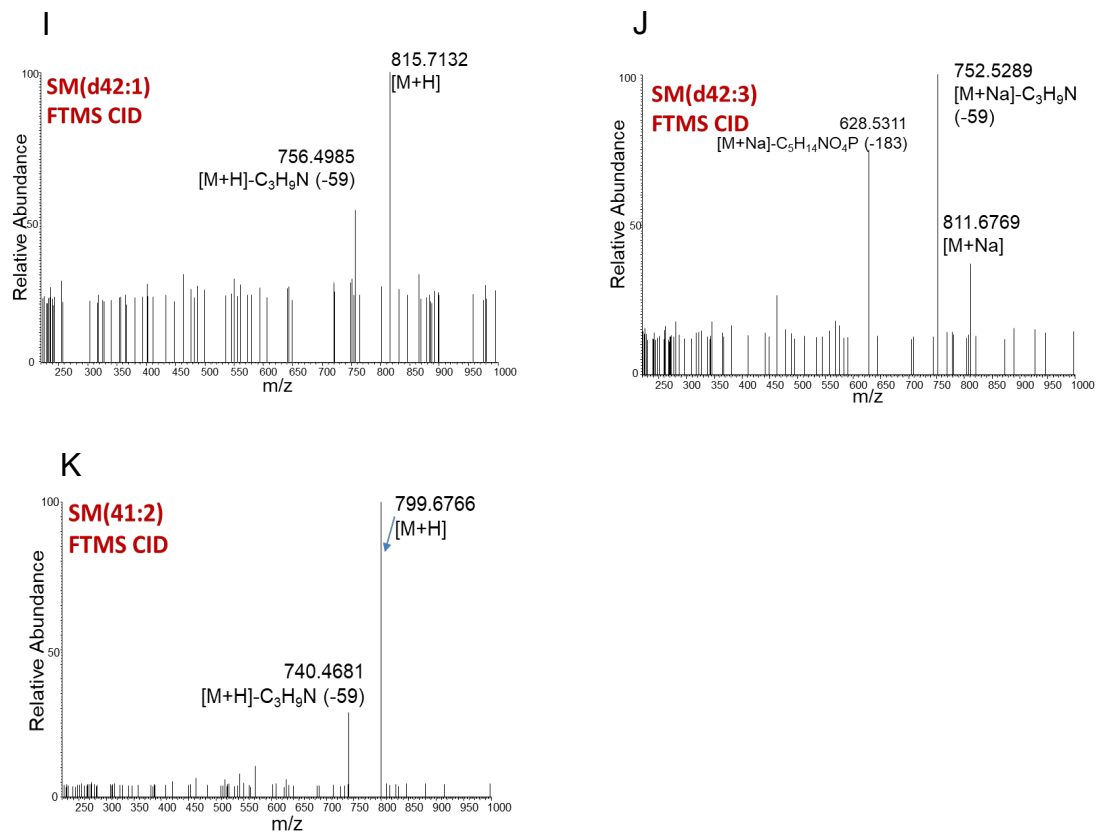

Fig. S8A. MS<sup>2</sup> identification of ions of interest at the single-cell level using collision-induced dissociation (CID) with Orbitrap mass analyzer (FTMS). (A) PC(32:1), (B) SM(d39:1), (C) SM(d34:1), (D) SM(d41:1), (E) SM(d39:2), (F) SM(d41:0), (G) SM(d40:2), (H) SM(d41:3), (I) SM(d42:1), (J) SM(d42:3), (K) SM(d41:2).

A

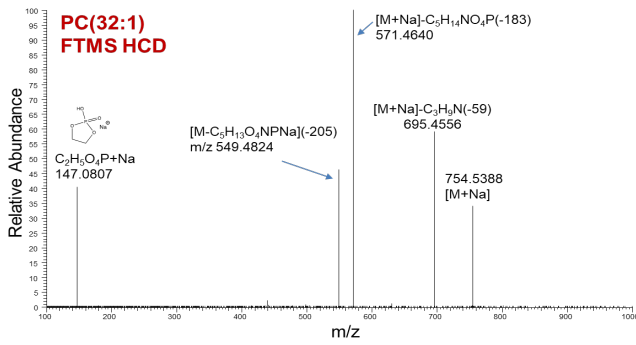

B

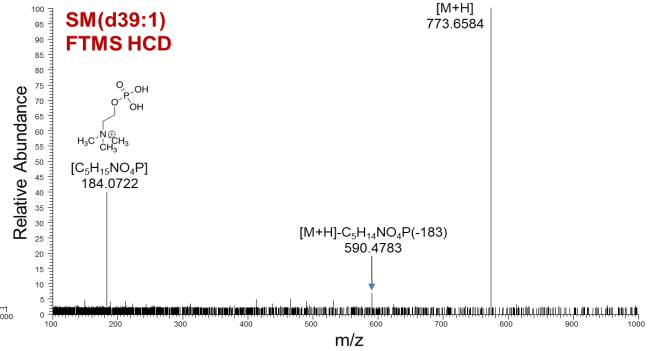

C

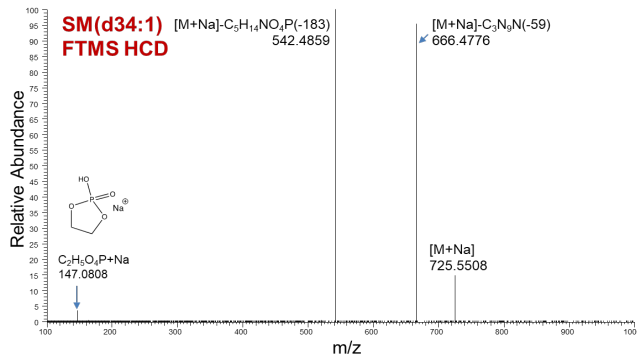

D

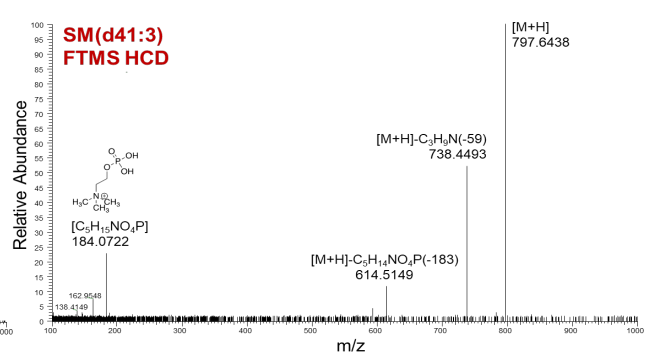

E

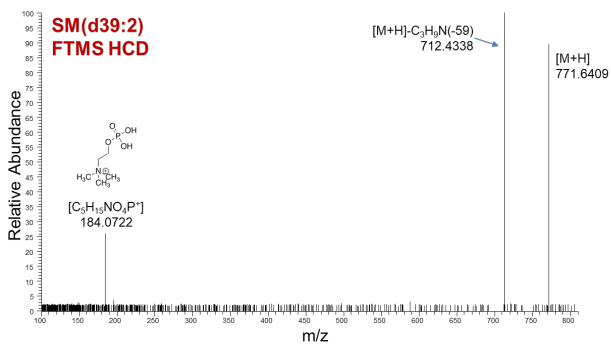

F

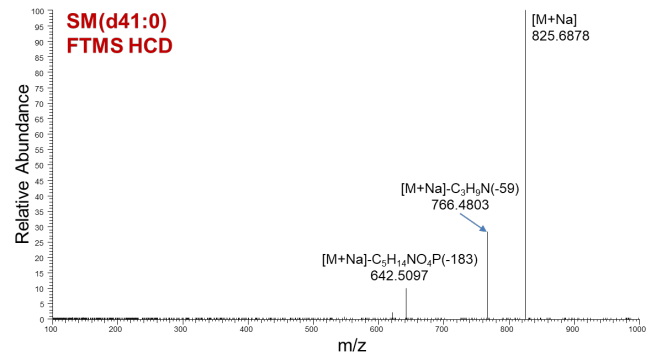

G

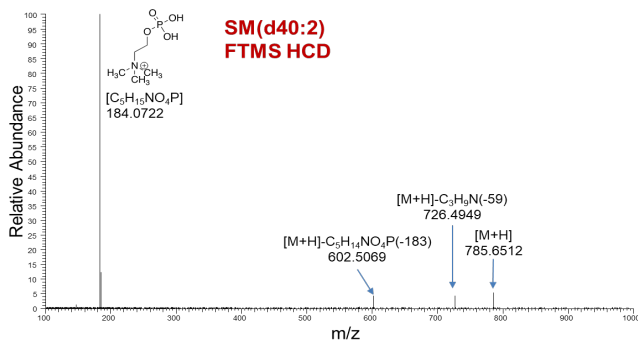

H

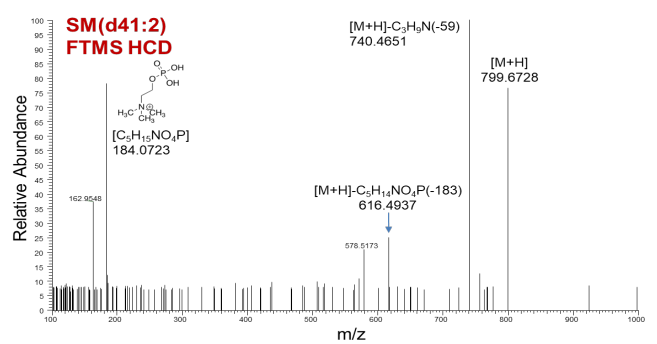

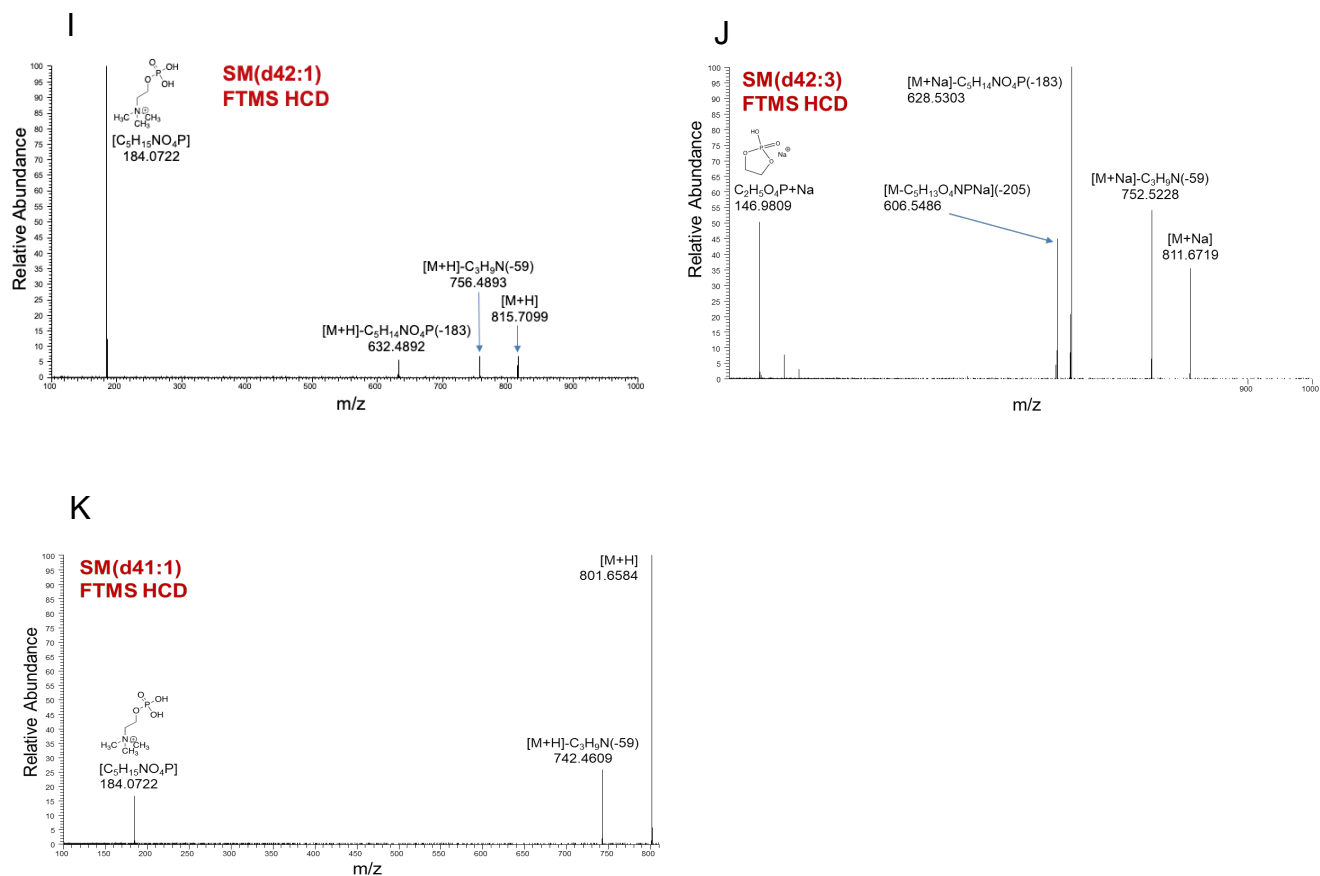

Fig. S8B. MS<sup>2</sup> identification of ions of interest at the single-cell level using higher energy collision dissociation (HCD) with Orbitrap mass analyzer (FTMS). (A) PC(32:1), (B) SM(d39:1), (C) SM(d34:1), (D) SM(d41:3), (E) SM(d39:2), (F) SM(d41:0), (G) SM(d40:2), (H) SM(d41:2), (I) SM(d42:1), (J) SM(d42:3), and (K) SM(d41:1).

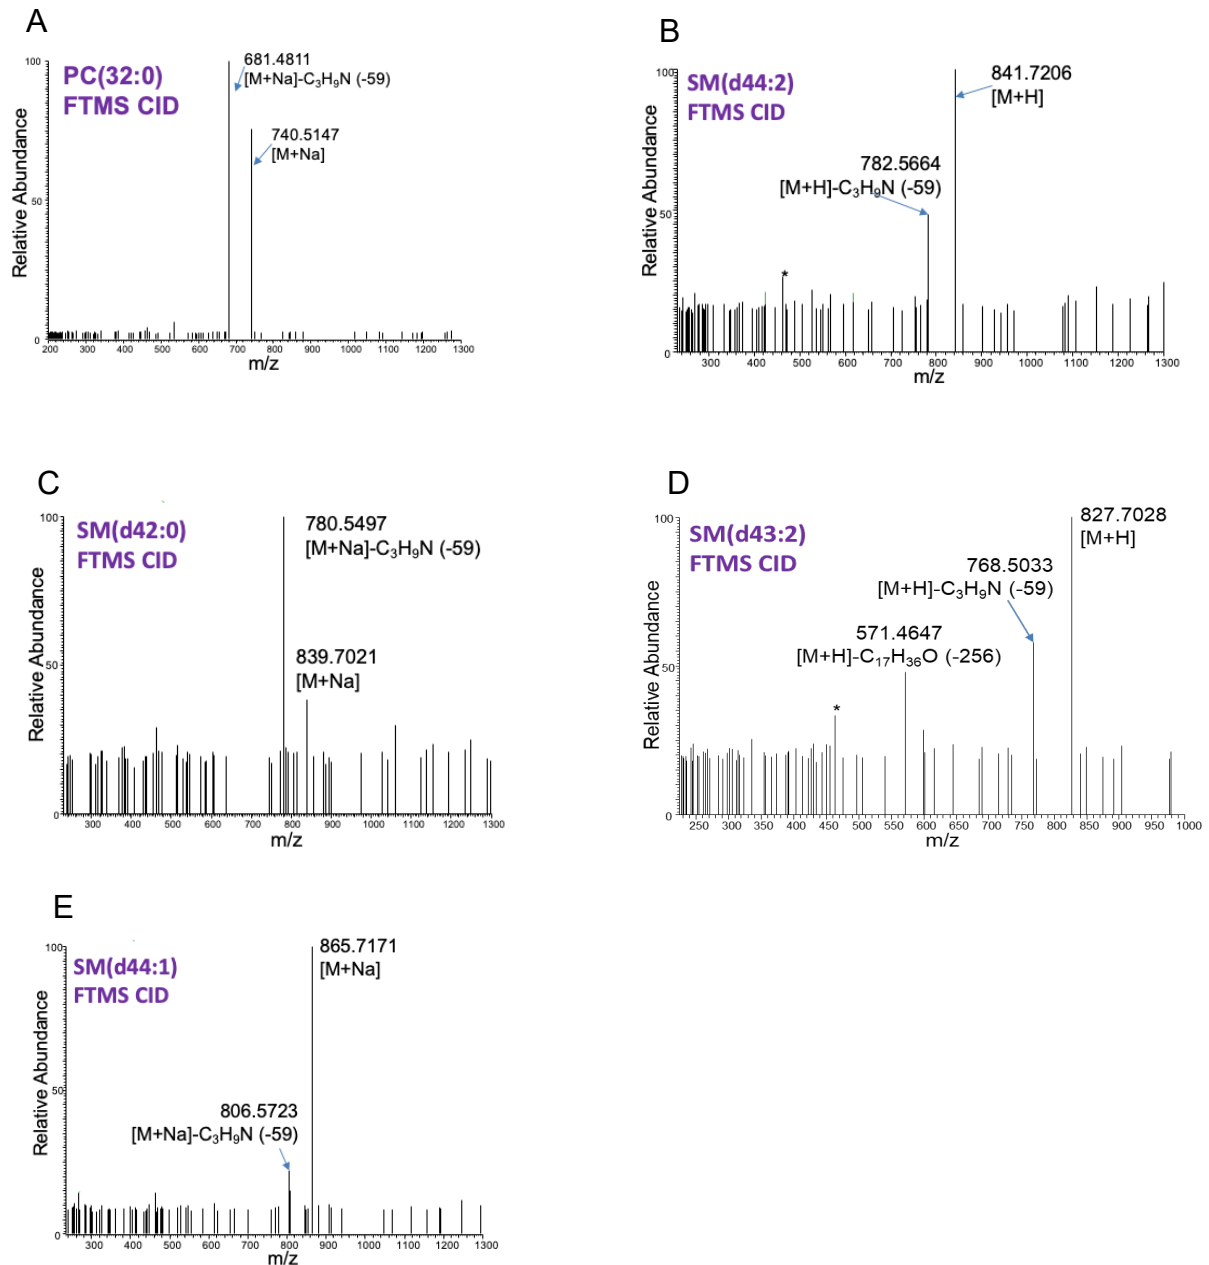

Fig. S9A. MS<sup>2</sup> identification of ions of interest from cell lysate using collision-induced dissociation (CID) with Orbitrap mass analyzer (FTMS). (A) PC(32:0), (B) SM(d44:2), (C) SM(d42:0), (D) SM(d43:2), and (E) SM(d44:1).

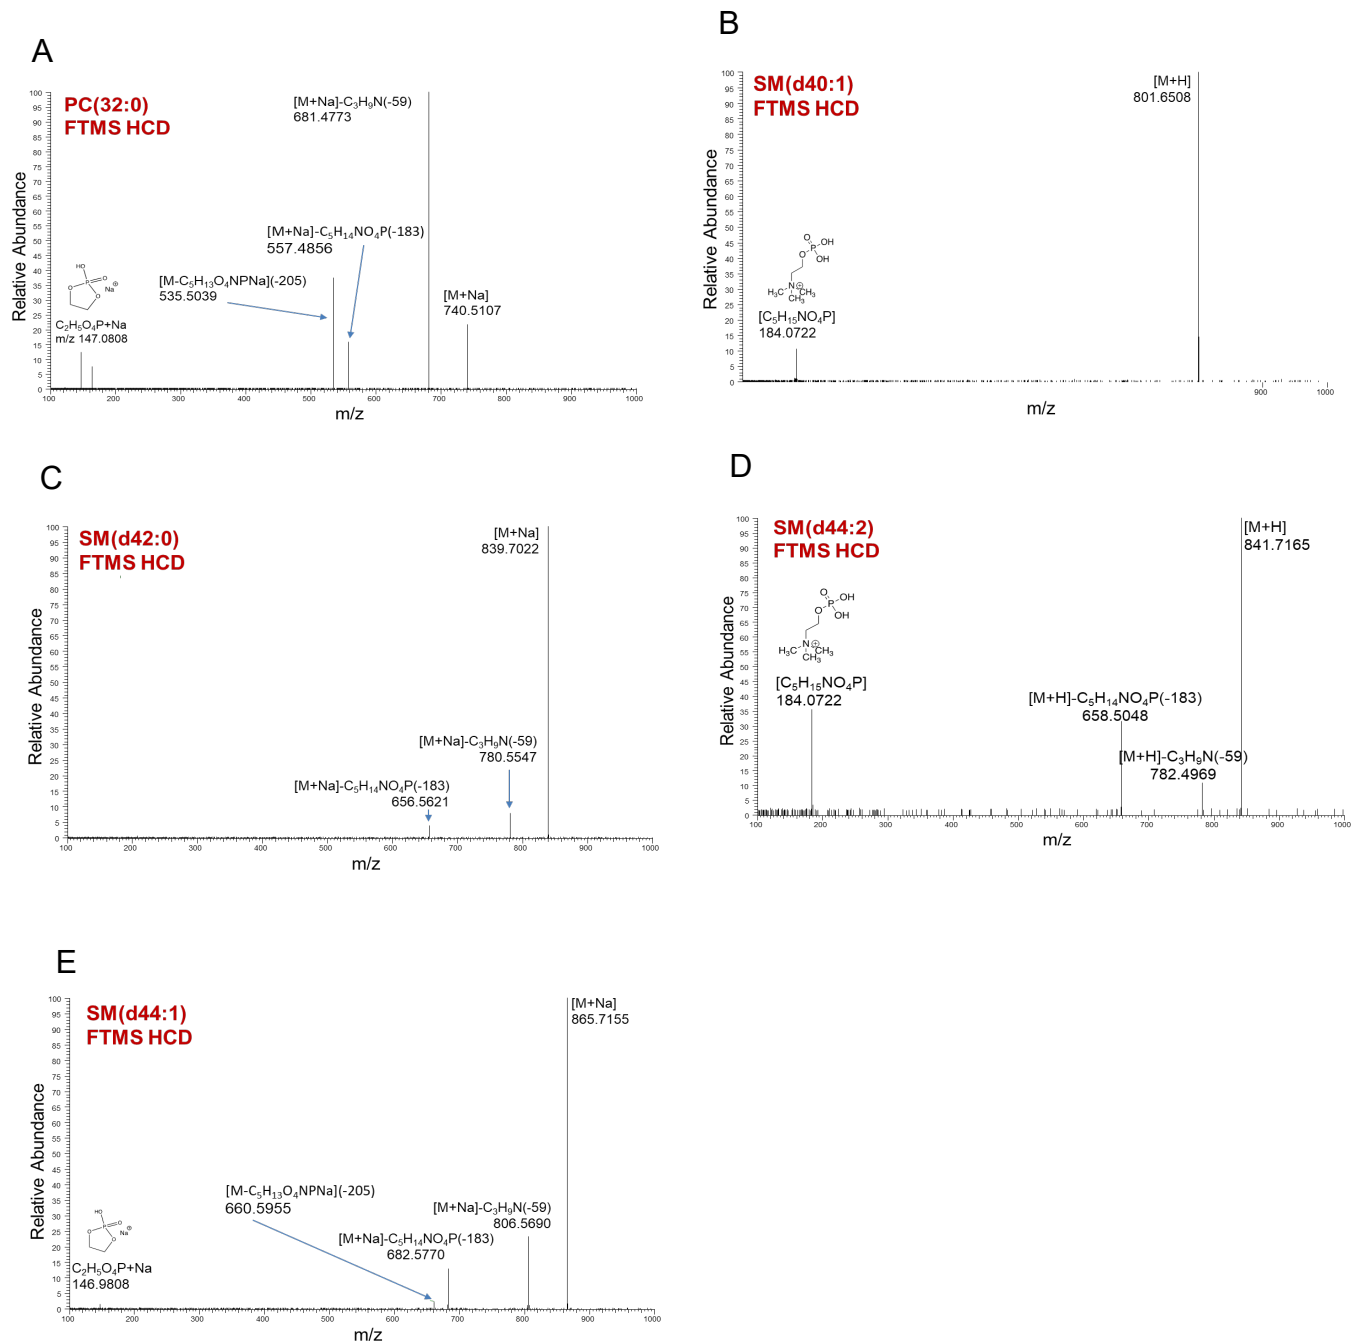

Fig. S9B. MS<sup>2</sup> identification of ions of interest from cell lysate (via direct injection) using higher energy collision dissociation (HCD) with Orbitrap mass analyzer (FTMS). (A) PC(32:0), (B) SM(d40:1), (C) SM(d42:0), (D) SM(d44:2), and (E) SM(d44:1).

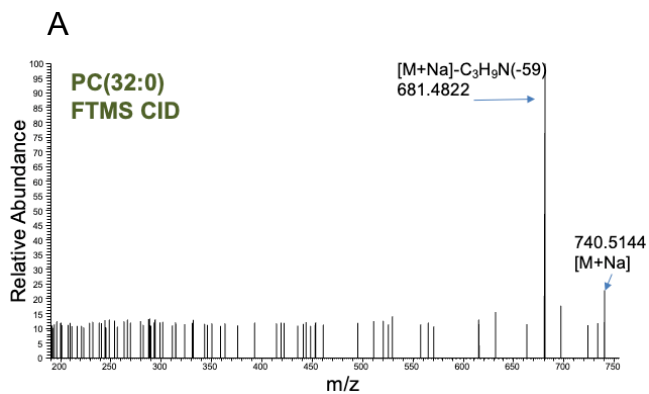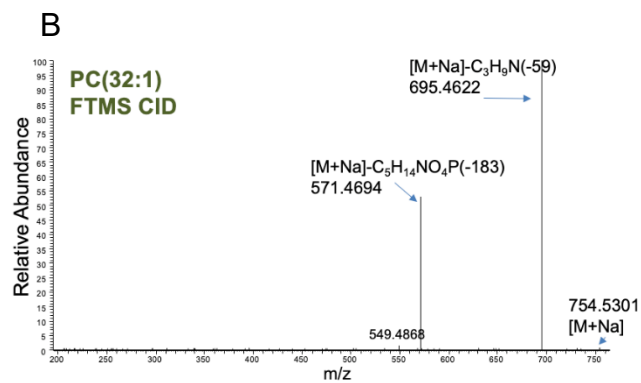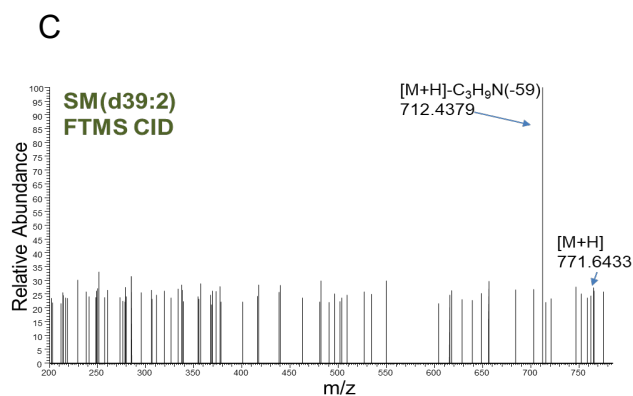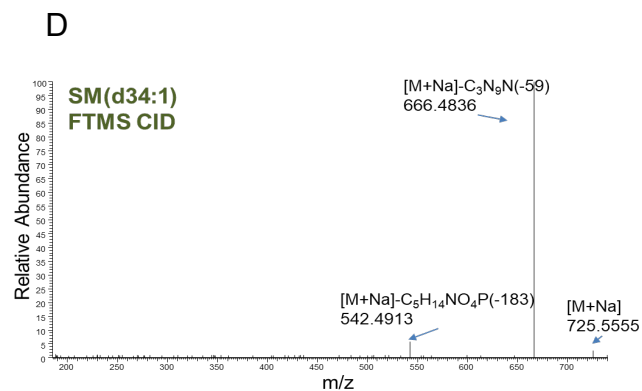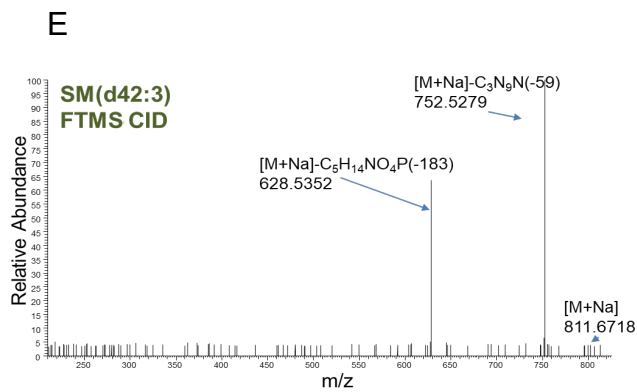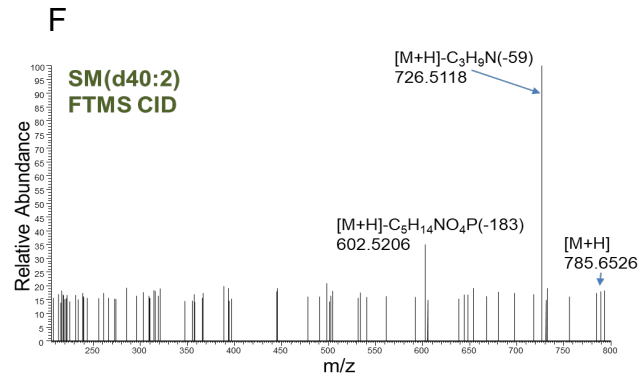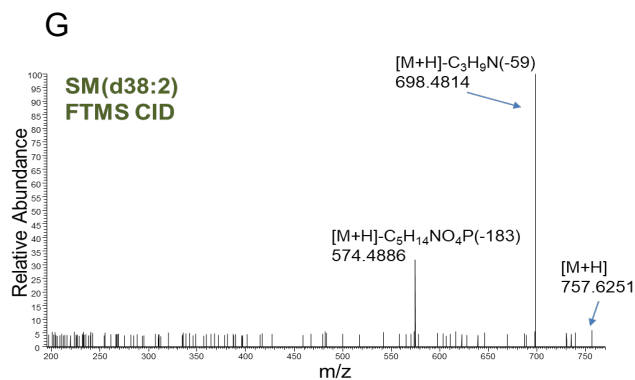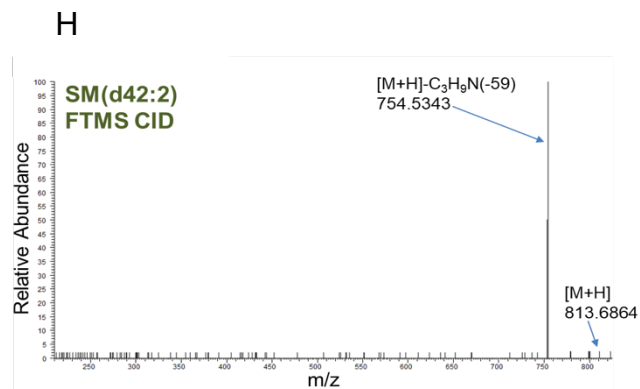

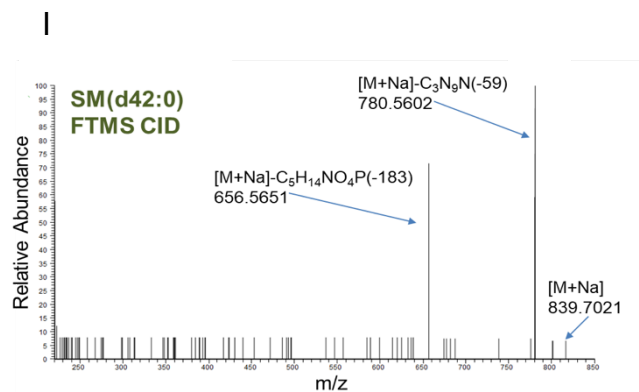

Fig. S10A. MS<sup>2</sup> identification of ions of interest from cell lysate (via HPLC-MS/MS) using collision-induced dissociation (CID) with Orbitrap mass analyzer (FTMS). (A) PC(32:0), (B) PC(32:1), (C) SM(d39:2), (D) SM(d34:1), (E) SM(d42:3), (F) SM(d40:2), (G) SM(d38:2), (H) SM(d42:2), (I) SM(d42:0).

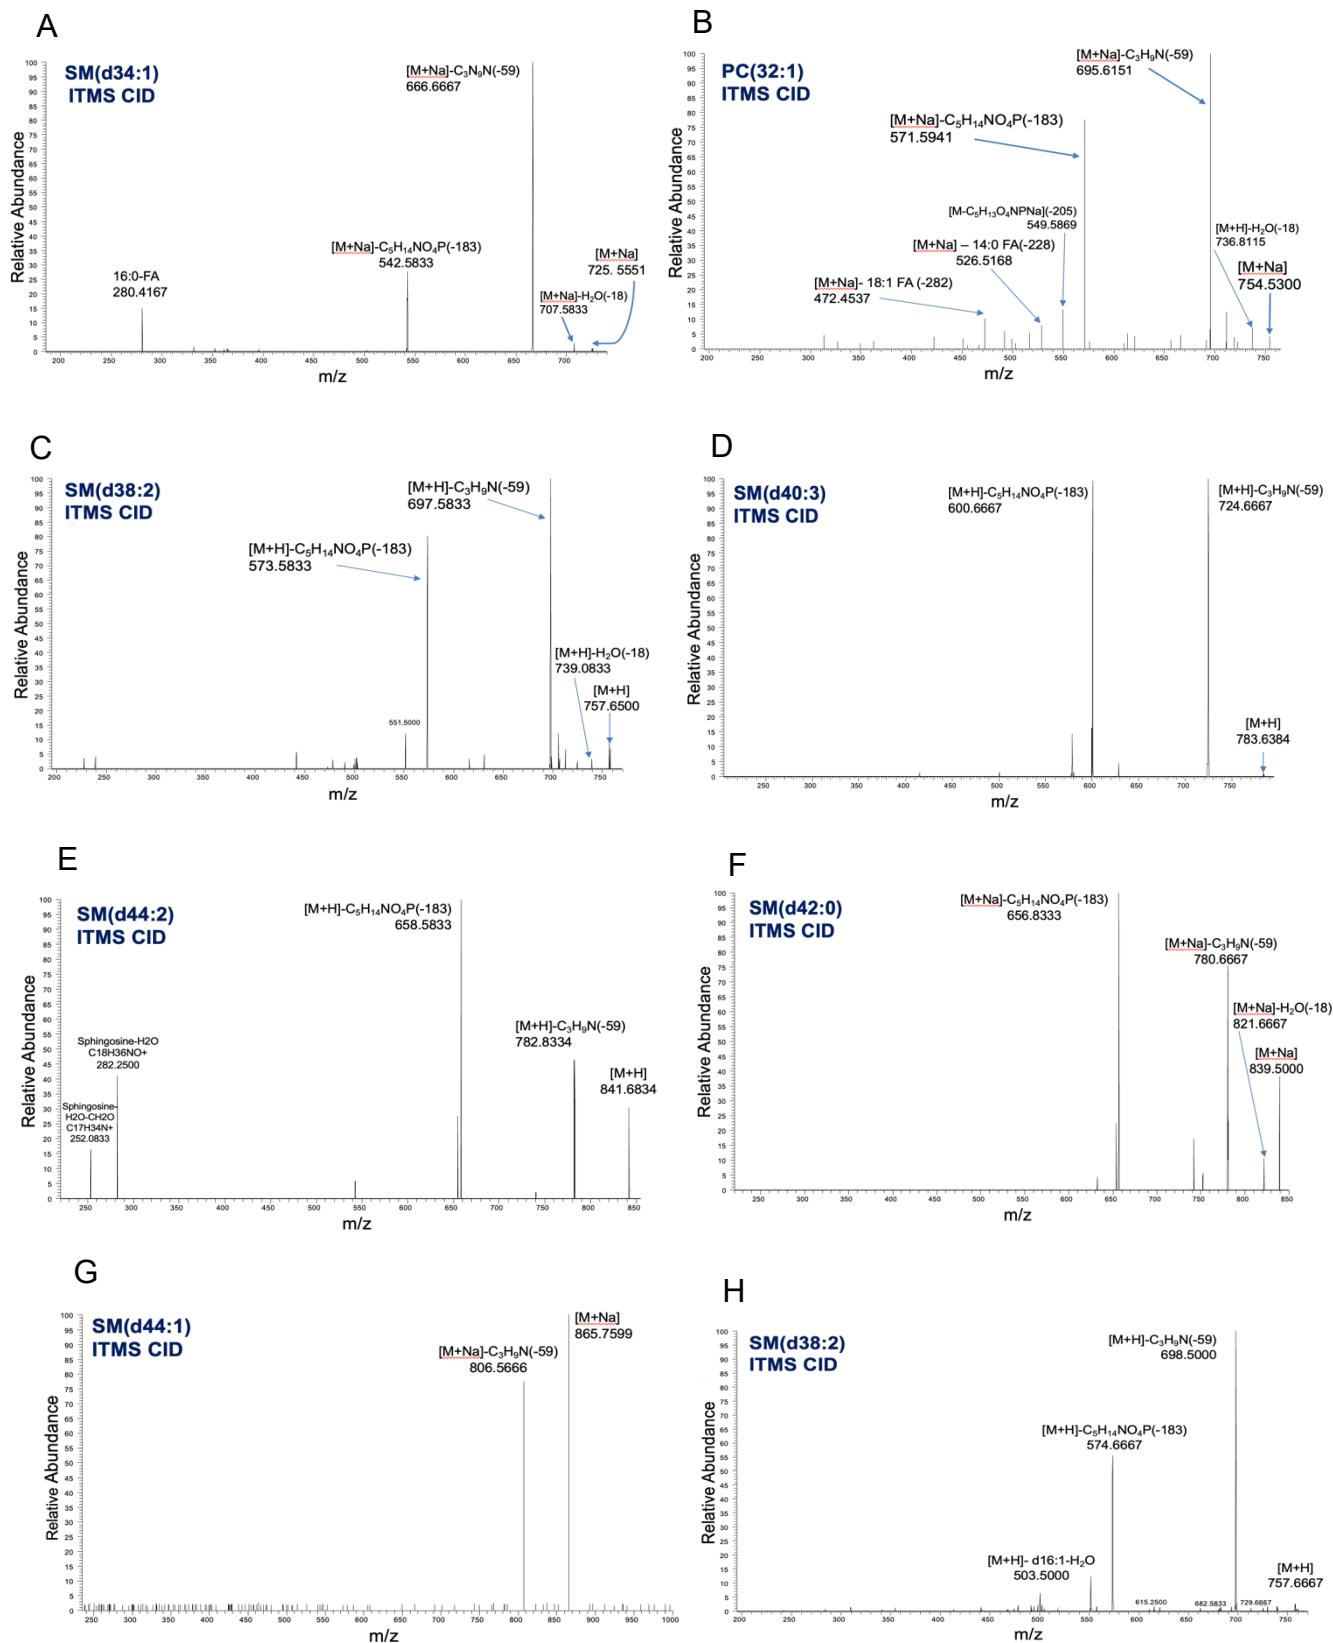

Fig. S10B. MS<sup>2</sup> identification of ions of interest from cell lysate (via HPLC-MS/MS) using ion- collision-induced dissociation (CID) with ion trap mass analyzer (ITMS) in the positive ion mode. (A) SM(d34:1), (B) PC(32:1), (C) SM(d38:2), (D) SM(d40:3), (E) SM(d44:1), (F) SM(d38:2).

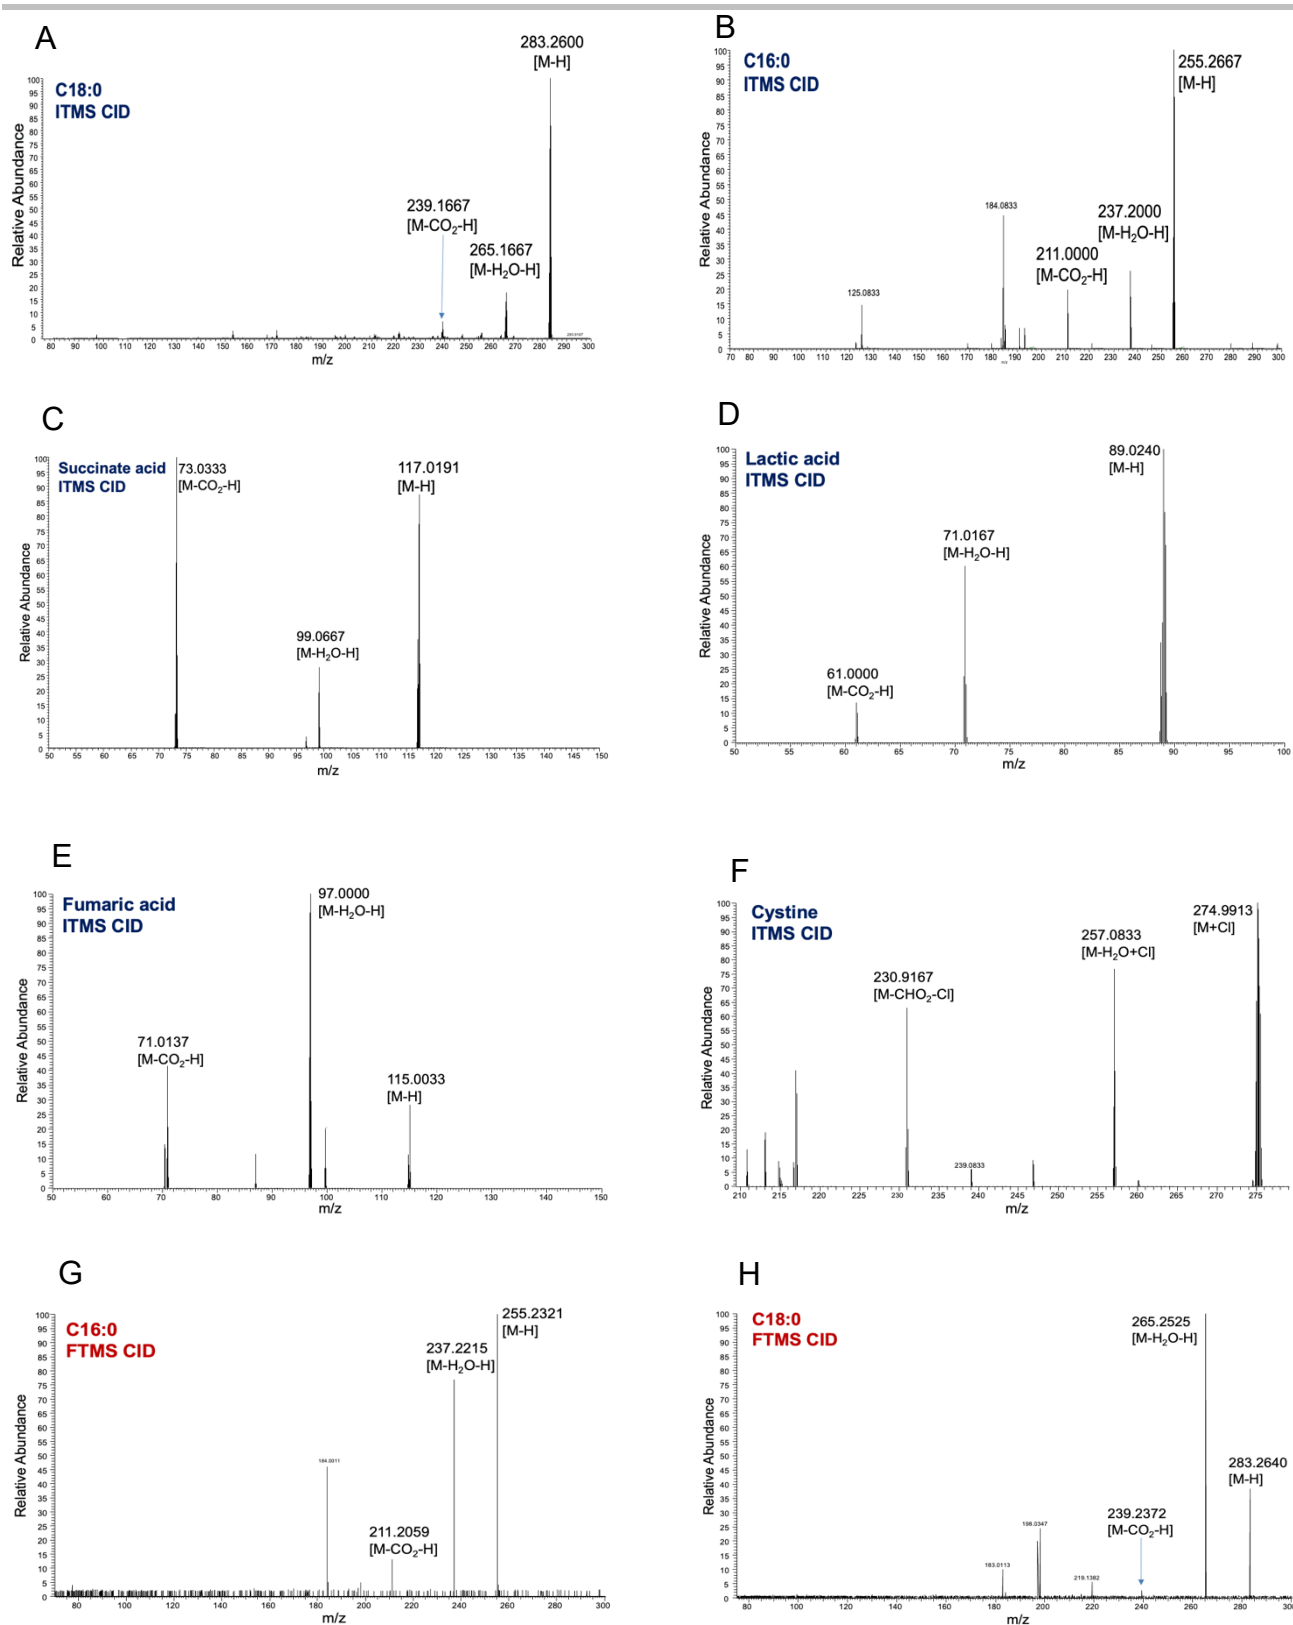

Fig. S11. MS<sup>2</sup> identification of ions of interest with CID from cell lysate in the negative ion mode. Data collection was performed using ion-trap (ITMS, A-F) or Orbitrap (FTMS, G-H) for (A) C18:0, (B) C16:0, (C) Succinate acid, (D) Lactic acid, (E) Fumaric acid, (F) Cystine. The collision-induced dissociation (CID) with orbitrap mass analyzer (FTMS) was used to confirm the structures of (G) C16:0 and (H) C18:0.
